# Supplementary material
Source: PubMed Central journal article supplement (PMC3329950)
Supplement: Supp_Data.pdf [file Supp_Data.pdf]

## Supplementary Data

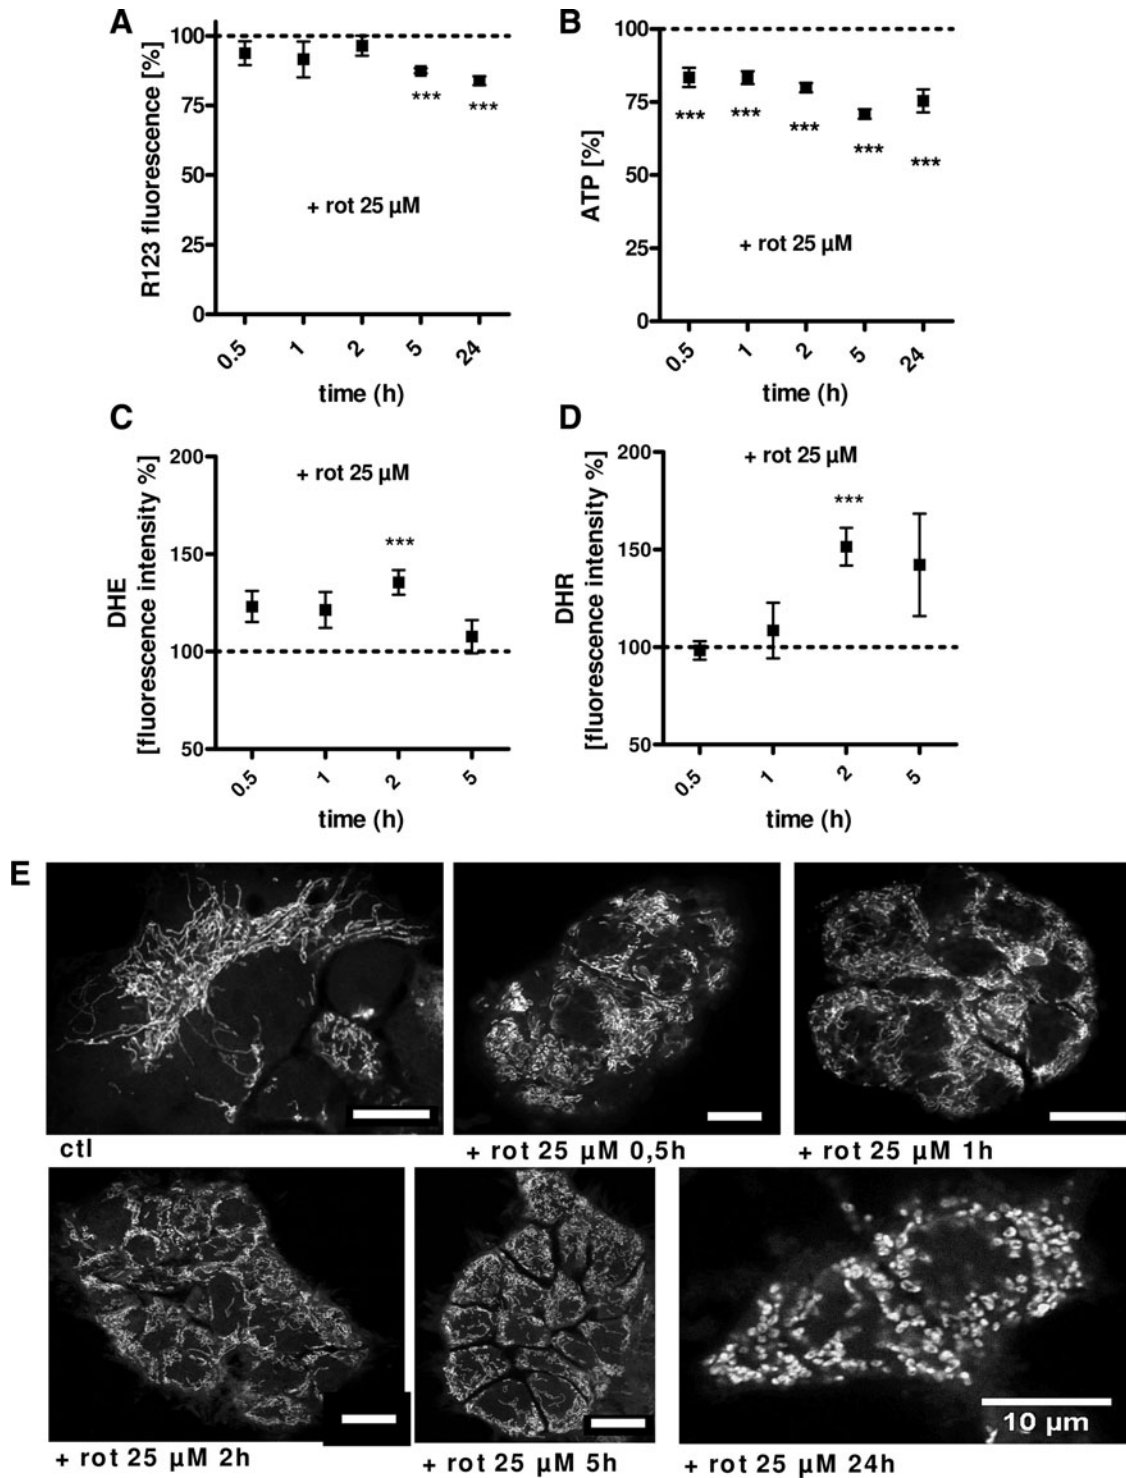

**SUPPLEMENTARY FIG. S1.** Time-dependent effect of rotenone (rot) 25  $\mu$ M on mitochondrial function in untransfected human embryonic kidney (HEKut) cells. (A) Time-dependent effect of rotenone (25  $\mu$ M) on mitochondrial membrane potential (R123 fluorescence intensity), ATP levels (B), superoxide anion radicals (dihydroethidium [DHE] fluorescence, C), and cytosolic reactive oxygen species (ROS; dihydrorhodamin [DHR] fluorescence, D) in HEKut cells. (E) Representative confocal images of the time-dependent effects of rotenone (25  $\mu$ M) on the mitochondrial morphology in HEKut cells (bars represent 10  $\mu$ m) compared to untreated controls after mitochondrial staining with MitoTracker CMXRos. (A–D)  $n=6 \pm$  standard error of the mean (SEM); unpaired  $t$ -test; \*\*\* $p < 0.001$ .

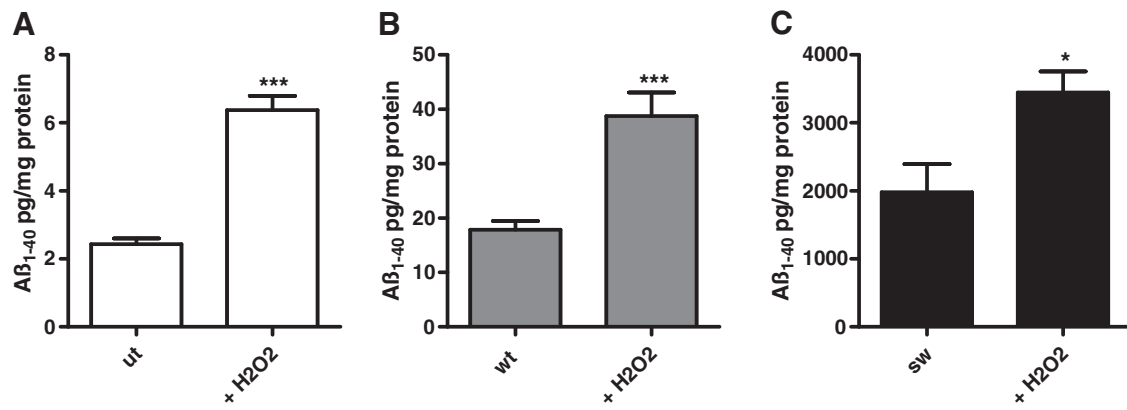

**SUPPLEMENTARY FIG. S2. Oxidative stress induces A $\beta$  generation.** HEK ctrl (A), wild-type amyloid precursor protein (APPwt) (B), and APP containing the Swedish mutation (APPsw) (C) cells were treated for 24 h with H<sub>2</sub>O<sub>2</sub> and soluble A $\beta$ <sub>1-40</sub> levels were investigated. (A–C)  $n=4-6 \pm$  SEM; unpaired  $t$ -test; \* $p < 0.05$ , \*\*\* $p < 0.001$ .
